# Supplementary material
Source: PubMed Central journal article supplement (PMC2956066)
Supplement: NIHMS240906-supplement-data.pdf [file NIHMS240906-supplement-data.pdf]

# S1

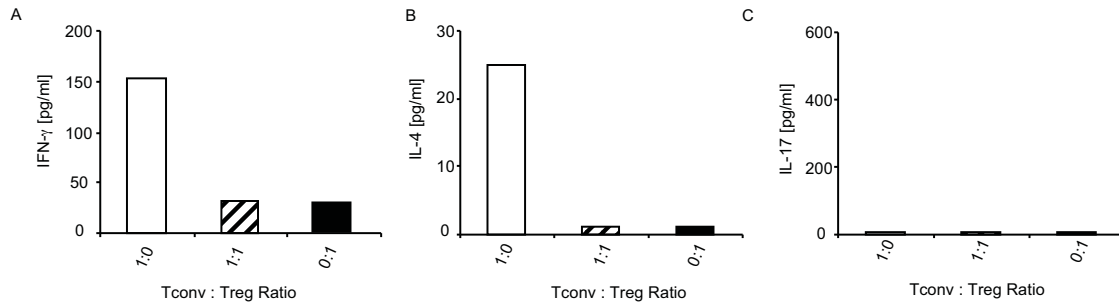

**S1. Co-culture of Tconv and Treg with anti-CD3 and anti-CD28 mAbs in the absence of APC fails to generate IL-17.** Tconv cells cultured with or w/o Treg cells were stimulated with anti-CD3 and anti-CD28 mAbs, supernatants were collected on day 3 of culture and production of IFN- $\gamma$ , IL-4 and IL-17 was measured by ELISA.

S2

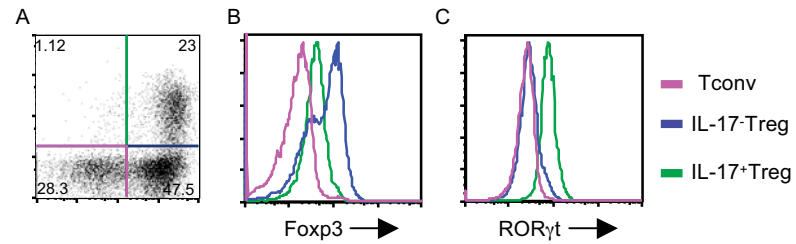

**S2. Expression of Foxp3 and ROR $\gamma$ t in IL-17+Treg cells at day 5 of culture.** Thy1.1- Tconv and Thy1.1+ Treg were mixed at 1:1 ratio and cultured with APC and anti-CD3 mAb for 5 days. Production of IL-17A was assessed by intracellular staining (A). Expression levels of Foxp3 (B) and ROR $\gamma$ t (C) on Thy1.1- Tconv cells, Thy1.1+IL-17- Treg cells and Thy1.1+IL-17+ cells were analyzed by flow cytometry.

S3

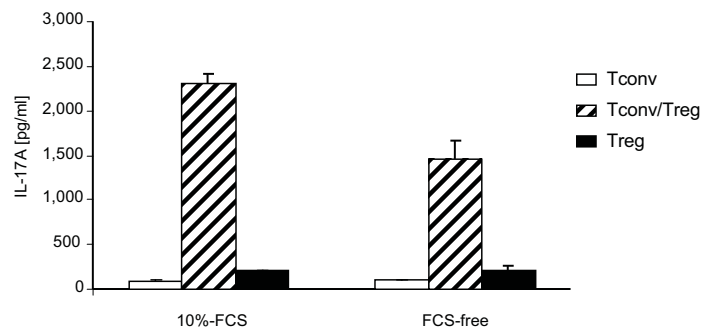

**S3. Co-culture of Tconv and Treg in FCS-free medium results in IL-17 production but to a lesser extent compared to the co-culture carried out in 10% FCS medium.** Tconv cultured with or w/o Treg were stimulated with anti-CD3 mAb in the presence of APC. The cultures were carried out either in FCS-free X-VIVO medium or RPMI medium containing 10%FCS. Supernatants were collected on day 3 of culture and production of IL-17 was measured by ELISA.

S4

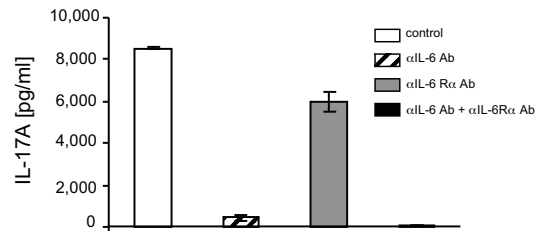

**S4. Neutralizing antibodies for IL-6 and blocking antibodies for IL-6R $\alpha$  abrogate IL-17 production induced by IL-6.** Tconv cultured with APC were stimulated with anti-CD3 mAb in the presence of TGF- $\beta$  and IL-6 (Th17 polarizing conditions). Neutralizing antibody for IL-6 and blocking antibody for IL-6R $\alpha$  were added individually or in combination and production of IL-17 was measured by ELISA.

S5

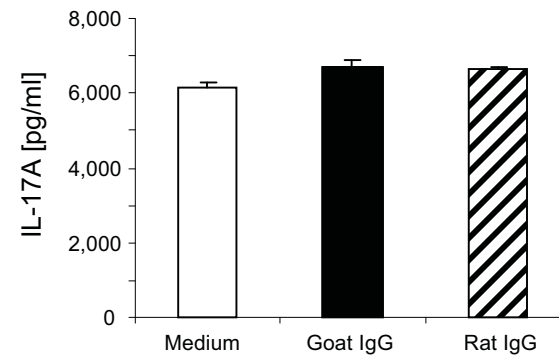

**S5. Isotype control antibodies have no effects on the production of IL-17 by Treg.** Tconv and Treg were mixed in 1:1 ratio, cultured with anti-CD3 mAb and APC in the presence of media, goat IgG isotype control for IL-1 $\beta$  neutralizing antibody and IL-6R blocking antibody, or Rat IgG isotype control for IL-6 neutralizing antibody. IL-17A was assessed by ELISA.

S6

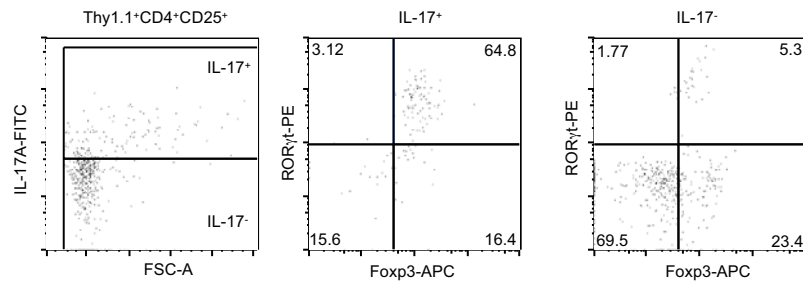

**S6. IL-17<sup>+</sup> Treg express ROR $\gamma$ t and Foxp3.** Treg cells from B6.PL congenic mice (Thy1.1<sup>+</sup>) were adoptively transferred into IL-1R1KO mice, which were subsequently immunized with KLH in IFA. Lymphocytes were collected three days after immunization and expression of ROR $\gamma$ t and Foxp3 were analyzed by intracellular staining and flow cytometry.

S7

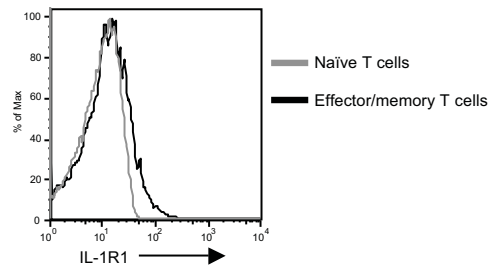

**S7. Expression of IL-1R1 on naïve and effector/memory CD4+ T cells.** Freshly isolated CD4+ T cells were simultaneously stained with PE-Cy7-anti-CD25, FITC-anti-CD44, APC-anti-CD62L and PE-anti-IL-1R1 antibodies. Expression of IL-1R1 was examined on gated naïve (CD25-CD62L+) and effector/memory (CD44+CD62L-) CD4+ T cell populations.
